# Supplementary material for: A versatile imaging platform with fluorescence and CT imaging capabilities that detects myeloperoxidase activity and inflammation at different scales
Source: PubMed Central journal article supplement (PMC6831463; doi:10.7150/thno.36264), 2019-10-12
Supplement: thnov09p7525s1.pdf [file thnov09p7525s1.pdf]

## Supplementary Material

### *Compound characterization by <sup>1</sup>H, <sup>13</sup>C NMR and LC-MS*

Compound **2**. <sup>1</sup>H NMR (500 MHz, DMSO) δ 12.48 (s, 1H), 10.48 (s, 1H), 8.59 (s, 1H), 7.11 (d, J = 8.0 Hz, 1H), 7.02 (d, J = 2.0 Hz, 1H), 6.93 (D, J = 8.5 Hz, 1H), 6.81 (d, J = 2.0 Hz, 1H), 6.57 (dd, J<sub>1</sub> = 8.5 Hz, J<sub>2</sub> = 2.0 Hz, 1H), 4.09 (m, 1H), 3.00 (dd, J<sub>1</sub> = 28 Hz, J<sub>2</sub> = 5Hz, 1H), 2.86 (dd, J<sub>1</sub> = 28 Hz, J<sub>2</sub> = 5Hz, 1H); <sup>13</sup>C NMR (125 MHz, DMSO) δ 174.0, 155.4, 150.2, 130.6, 127.7, 124.1, 111.7, 111.2, 109.1, 102.0, 78.0, 54.3, 28.2, 26.9; LCMS found m/z: 321.3 (M+1).

Compound **3**. <sup>1</sup>H NMR (500 MHz, DMSO) δ 10.45 (s, 2H), 8.56 (s, 1H), 8.54 (s, 1H), 7.89 (t, 1H), 7.10 (d, J = 8.5 Hz, 1H), 7.09 (d, J = 9.0 Hz, 1H), 7.0 (m, 2H), 6.88 (d, J = 1.5 Hz, 1H), 6.83 (d, J = 2.0 Hz, 1H), 6.67 (d, J = 8.5 Hz, 1H), 6.57 (m, 2H), 4.12 (m, 1H), 3.26 (m, 2H), 2.96 (dd, J<sub>1</sub> = 14.5 Hz, J<sub>2</sub> = 4.5 Hz, 1H), 2.79 (dd, J<sub>1</sub> = 14.5 Hz, J<sub>2</sub> = 4.5 Hz, 1H), 2.66 (m, 2H), 1.32 (s, 9H); <sup>13</sup>C NMR (125 MHz, DMSO) δ 171.8, 155.1, 150.15, 150.13, 130.8, 130.6, 128.1, 127.8, 123.9, 123.0, 111.6, 111.4, 111.2, 111.1, 110.7, 109.3, 102.5, 102.2, 77.9, 55.0, 40.1, 28.2, 28.0, 25.2; LCMS found m/z: 479.4 (M+1).

Compound **1**. <sup>1</sup>H NMR (500 MHz, DMSO) δ 10.5 (s, 1H), 10.4 (s, 1H), 7.96 (t, 1H), 7.89 (d, J = 8.0 Hz, 1H), 7.10 (d, J = 8.5 Hz, 1H), 7.09 (d, J = 8.5 Hz, 1H), 6.99 (m, 2H), 6.88 (d, J = 2.0 Hz, 1H), 6.82 (d, J = 2.0 Hz, 1H), 6.57 (m, 2H), 6.39 (b, 2H), 4.47 (m, 1H), 4.26 (m, 1H), 4.04 (m, 1H), 3.26 (m, 2H), 3.00 (m, 2H), 2.78 (m, 3H), 2.65 (m, 2H), 2.07 (m, 2H), 1.55 (m, 1H), 1.42 (m, 3H), 1.20 (m, 2H); <sup>13</sup>C NMR (125 MHz, DMSO) δ 173.6, 173.2, 164.4, 151.8, 132.5, 132.3, 129.7, 129.5, 125.6, 124.8, 113.3, 113.1, 112.9, 112.8, 112.4, 111.0, 104.2, 103.9, 62.6, 60.9, 57.0, 54.9, 36.6, 29.7, 29.6, 29.5, 27.1, 26.9, 26.8, 26.0; LCMS found m/z: 605.3 (M+1).

Compound **1'**. <sup>1</sup>H NMR (500 MHz, DMSO) δ 10.79 (s, 1H), 10.77 (s, 1H), 8.03 (m, 1H), 7.94 (d, J = 8.0 Hz, 1H), 7.58 (d, J = 8.0 Hz, 1H), 7.52 (d, J = 8.0 Hz, 1H), 7.31 (m, 2H), 7.10 (m, 2H), 7.04 (m, 2H), 6.96 (m, 2H), 6.39 (s, 1H), 4.50 (m, 1H), 4.25 (m, 1H), 4.03 (m, 1H), 3.30 (m, 2H), 3.05 (m, 1H), 2.98 (m, 1H), 2.88 (m, 1H), 2.75 (M, 2H), 2.54 (d, 1H), 2.05 (m, 2H), 1.53 (m, 1H), 1.41 (m, 3H), 1.18 (m, 2H); <sup>13</sup>C NMR (125 MHz, DMSO) δ 172.9, 172.5, 163.7, 137.1, 137.0, 128.3, 128.1, 124.4, 123.6, 121.8, 121.7, 119.5, 119.2, 119.1, 119.0, 112.7, 112.3, 112.2, 111.3, 61.9, 60.1, 56.3, 54.3, 35.9, 29.0, 28.8, 28.7, 26.1, 26.0. LCMS found m/z: 573.4 (M+1).

## Supplementary Figures

### A

| n | Annotation           | Observed  | Theoretical | mass accuracy (ppm) |
|---|----------------------|-----------|-------------|---------------------|
| 1 | [M+H] <sup>+</sup>   | 605.2540  | 605.2541    | -0.17               |
| 1 | [M-H] <sup>-</sup>   | 603.2398  | 603.2395    | 0.50                |
| 2 | [M+H] <sup>+</sup>   | 1207.4840 | 1207.4852   | -0.99               |
| 2 | [M-H] <sup>-</sup>   | 1205.4698 | 1205.4707   | -0.75               |
| 3 | [M-H] <sup>-</sup>   | 1807.6966 | 1807.7018   | -2.88               |
| 3 | [M-2H] <sup>2-</sup> | 903.3456  | 903.3473    | -1.88               |

### B

**MABS**  
**n = 1**

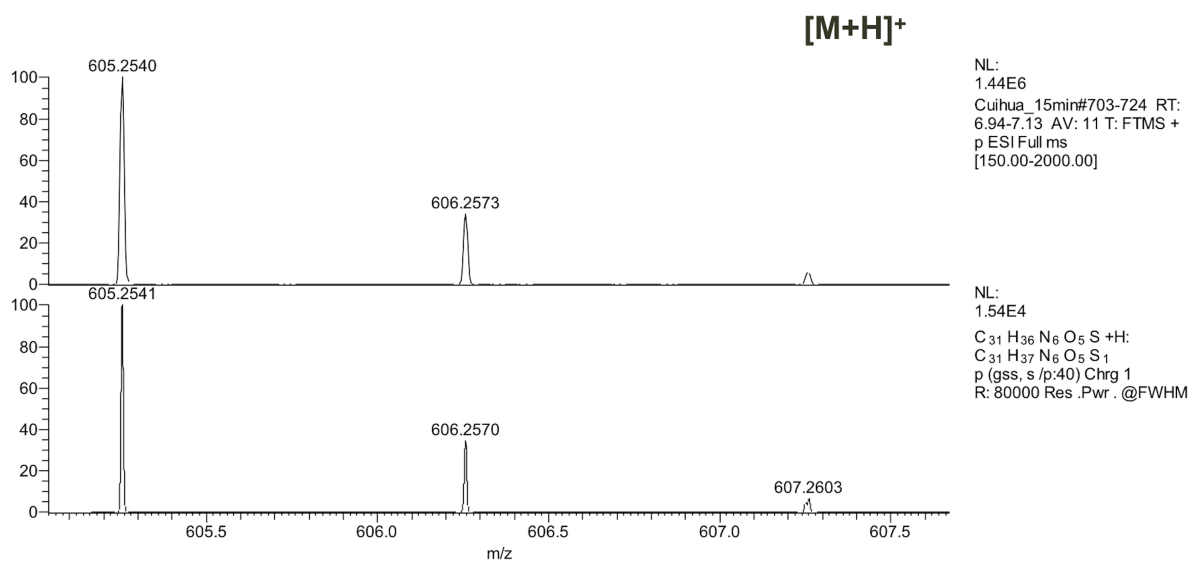

**Dimer**  
**n = 2**

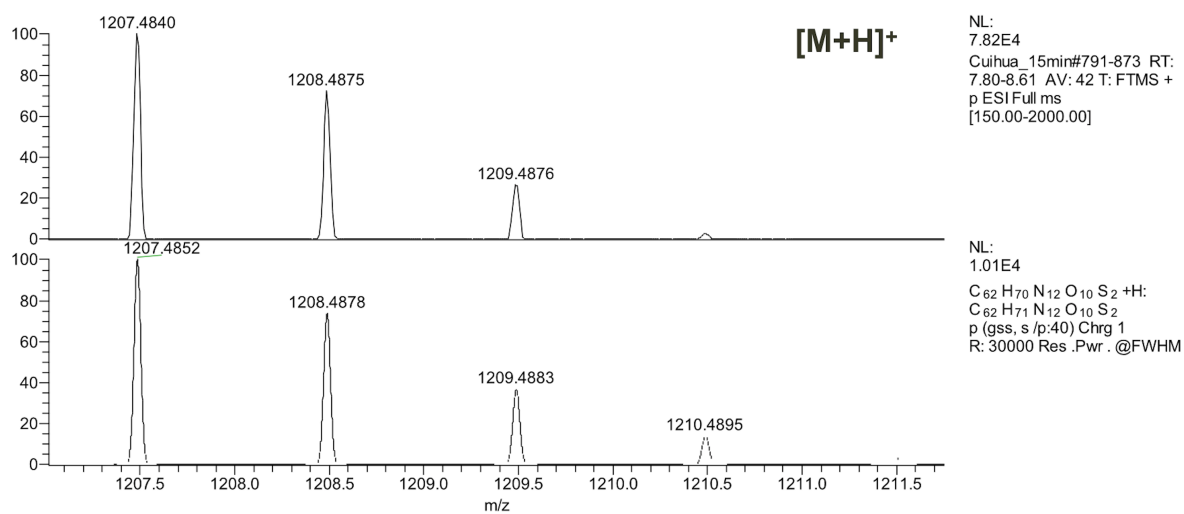

Trimer  
n = 3

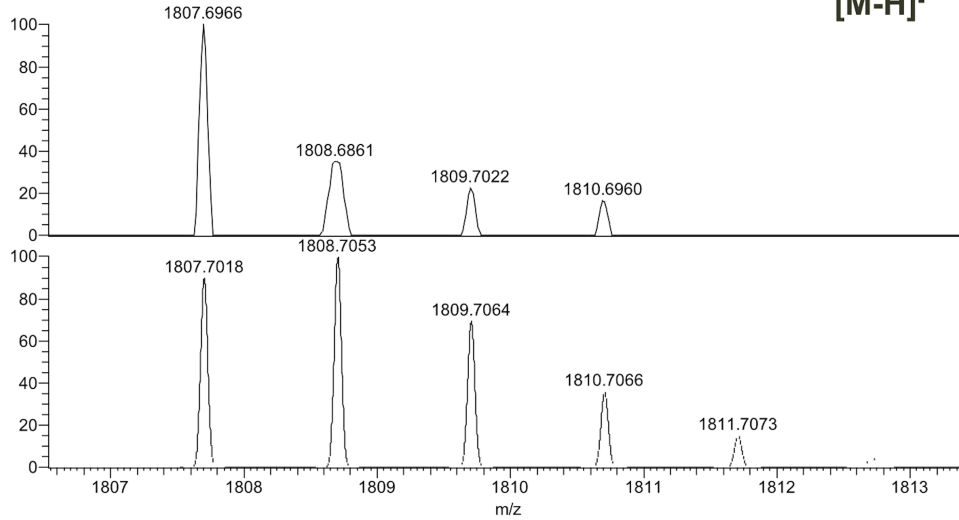

[M-H]<sup>-</sup>

NL:  
3.46E3  
Cuihua\_15min#832-861 RT:  
8.20-8.48 AV: 15 T: FTMS -p  
ESI Full ms [150.00-2000.00]

NL:  
7.31E3  
C<sub>93</sub>H<sub>104</sub>N<sub>18</sub>O<sub>15</sub>S<sub>3</sub>+H:  
C<sub>93</sub>H<sub>103</sub>N<sub>18</sub>O<sub>15</sub>S<sub>3</sub>  
p (gss, s/p:40) Chrg -1  
R: 30000 Res. Pwr. @FWHM

**Figure S1. Identification of oligomer formation of MABS after activation by MPO with high-resolution LC-MS.** (A) Result summary of MABS and its oligomers from both positive ion mode and negative ion mode detection (n=1, MABS; n=2, dimer; n=3, trimer). (B) Representative chromatograph of high-resolution LC-MS of MABS, its dimer and trimer (upper: experimental m/z; lower: theoretical m/z).

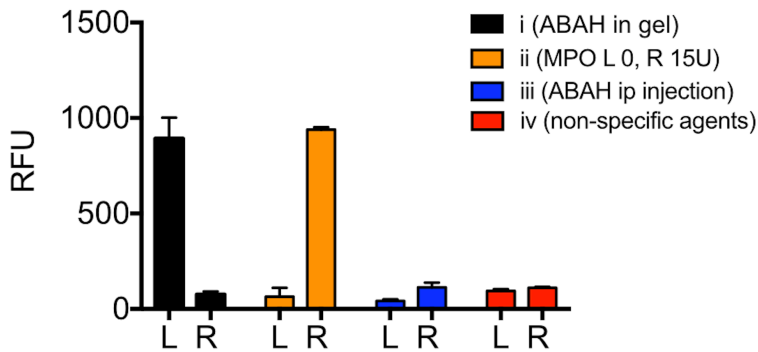

**Figure S2. Quantification of Fig. 2C for validation of specificity of MABS in Matrigel implant experiment.** i. ABAHA embedded on right side; ii. 0U and 15U of MPO on left and right side, respectively; iii. ABAHA ip. injected; iv. Non-specific agents administered. (N=3)

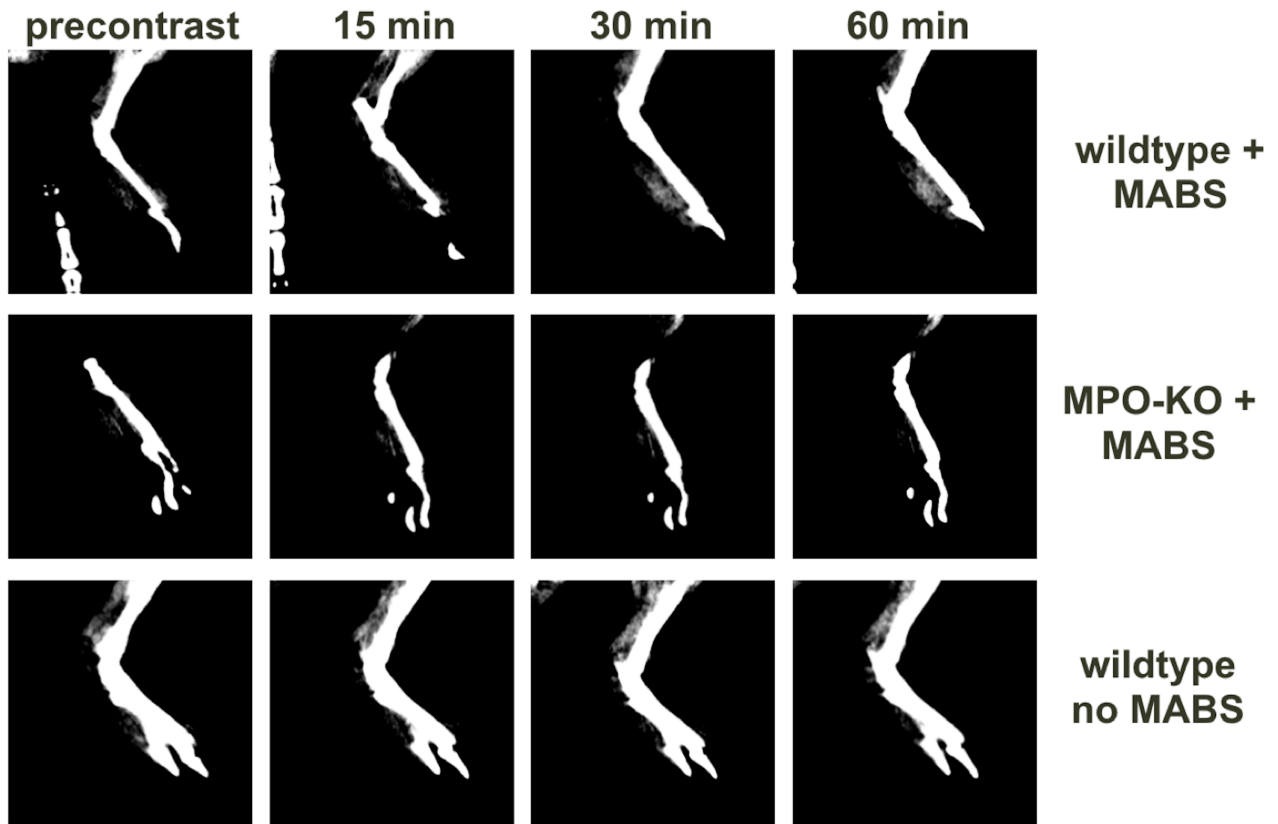

**Figure S3: Representative gray-scale CT images of paw inflammation induced by complete Freund's adjuvant.**
